# Supplementary material
Source: publisher figshare collection journal article supplement (https://gsajournals.figshare.com/ndownloader/files/28321920)
Supplement: Supplementary file 1 [file 28321920]

## Sheet: Table S8
Table S8 Number of GO terms of differentially expressed genes between the different samples
	NNL	NTL	TTL	TNL	NNRX	NNRJ	TNRX	TNRJ	TTRX	TTRJ	NTRX	NTRJ
NNL		22	50	11	42	30	33	31	44	33	52	32
NTL	32		16	30	42	27	28	26	23	30	32	46
TTL	18	11		21	49	27	26	23	18	24	21	43
TNL	29	15	30		33	24	26	25	36	35	72	25
NNRX	41	47	62	31		2	4	17	18	16	29	5
NNRJ	52	47	64	41	10		19	22	21	20	32	15
TNRX	37	41	41	22	5	2		4	12	11	6	2
TNRJ	47	48	41	36	19	30	20		6	6	3	33
TTRX	58	46	43	37	17	34	17	2		0	2	39
TTRJ	41	43	41	29	20	27	17	0	0		16	39
NTRX	41	44	57	21	17	12	14	4	5	2		13
NTRJ	35	44	62	26	7	2	10	18	19	12	24
Note: The triangle above represents the number of up-regulated GO terms, the triangle below represents the number of down-regulated GO terms. Small serial number samples VS large serial number samples
